# Supplementary material
Source: Royal Society of Chemistry journal article supplement (doi:10.1039/d6tc00745g)
Supplement: d6tc00745g1.pdf [file d6tc00745g1.pdf]

# Interpretable machine learning screening and analysis of pressure sensitivity and high-pressure emission line shifts in lanthanide and transition metal doped phosphors

Tianshun Gong<sup>1</sup>, Jiayang Zhou<sup>1</sup>, and Xiangfu Wang<sup>1,2\*</sup>

<sup>1</sup>College of Electronic and Optical Engineering & College of Flexible Electronics (Future Technology), Nanjing University of Posts and Telecommunications, Nanjing, 210023, China

<sup>2</sup>Anhui Province Key Laboratory of Environment-Friendly Polymer Materials, Anhui University, Hefei 230601, China

## Brief introduction to the mathematical principles of algorithms

### 1. Linear Regression

Linear Regression serves as the fundamental baseline for regression analysis, aiming to model the relationship between the scalar dependent variable and one or more explanatory variables. It estimates the regression coefficients by minimizing the residual sum of squares between the observed and predicted targets. The classical objective function is expressed as:

$$\min_{\beta} \|y - X\beta\|_2^2 \quad (1)$$

Where  $y$  denotes the vector of observed values,  $X$  represents the feature matrix, and  $\beta$  is the vector of regression coefficients to be optimized.

### 2. Ridge Regression

Ridge Regression addresses the issue of multicollinearity often present in multiple linear regression by introducing an L2-norm regularization term. This method constrains the magnitude of the coefficients, thereby reducing model variance and preventing overfitting. The cost function is modified as follows:

$$J(\beta) = \sum_{i=1}^n (y_i - \sum_{j=0}^p x_{ij}\beta_j)^2 + \lambda \sum_{j=0}^p \beta_j^2 \quad (2)$$

Here,  $\lambda$  is the complexity parameter (regularization strength) that controls the amount of shrinkage applied to the coefficients  $\beta_j$ .

### 3. Decision Tree Regression (DT)

Decision Tree Regression is a non-parametric method that models the value of a target variable by learning simple decision rules inferred from the data features. The tree grows by recursively partitioning the feature space into rectangular regions. The quality of a split is typically measured by the Mean Squared Error (MSE). For a node  $m$  representing a region  $R_m$  with  $N_m$  observations, the MSE is calculated as:

$$\text{MSE} = \frac{1}{N_{m_i \in R_m}} \sum (y_i - \bar{y}_m)^2 \quad (3)$$

Where  $y_i$  is the actual value of the sample and  $\bar{y}_m$  is the mean response value of the samples falling into region  $R_m$ .

### 4. Random Forest Regression (RF)

Random Forest is an ensemble learning method that operates by constructing a multitude of decision trees during training. It employs the bagging (bootstrap aggregating) technique to generate diverse training subsets. The final prediction is obtained by averaging the output of individual trees to improve predictive accuracy and control over-fitting. The aggregation formula is:

$$\hat{y} = \frac{1}{B} \sum_{b=1}^B f_b(x) \quad (4)$$

In this equation,  $B$  represents the total number of trees in the forest, and  $f_b(x)$  denotes the prediction output from the  $b$ -th decision tree for the input vector  $x$ .

### 5. Gradient Boosting Decision Tree (GBDT)

Gradient Boosting Decision Tree is an iterative algorithm that constructs an ensemble of weak prediction models, typically decision trees, in a stage-wise fashion. Unlike Random Forest, GBDT builds trees sequentially, where each new tree aims to correct the pseudo-residuals (negative gradient of the loss function) left by the preceding models. The update rule for the model at step  $m$  is given by:

$$F_m(x) = F_{m-1}(x) + v \cdot h_m(x) \quad (5)$$

Here,  $F_{m-1}(x)$  is the ensemble prediction from the previous stage,  $h_m(x)$  is the weak learner fitted to the current residuals, and  $\nu$  is the learning rate scaling the contribution of each tree.

## 6. XGBoost Regression

eXtreme Gradient Boosting (XGBoost) is a scalable and highly efficient implementation of gradient boosting. It distinguishes itself by utilizing a second-order Taylor expansion of the loss function to optimize the objective and incorporates a regularization term explicitly into the objective function to control model complexity. The objective function at iteration  $t$  is:

$$L^{(t)} = \sum_{i=1}^n l(y_i, \hat{y}_i^{(t-1)} + f_t(x_i)) + \Omega(f_t) \quad (6)$$

Where  $l$  is the differentiable convex loss function measuring the difference between the prediction  $\hat{y}_i$  and the target  $y_i$ , and  $\Omega(f_t)$  represents the regularization term penalizing the complexity of the tree structure.

## 7. LightGBM Regression

Light Gradient Boosting Machine (LightGBM) is a distributed gradient boosting framework that uses tree-based learning algorithms. It is designed for efficiency and faster training speed, employing a histogram-based algorithm to bucket continuous feature values. A key feature is the leaf-wise (best-first) tree growth strategy with max depth limitation, which tends to achieve lower loss than level-wise growth. The split gain for a leaf is calculated based on gradients:

$$\text{Gain} = \frac{1}{2} \left[ \frac{G_L^2}{H_L + \lambda} + \frac{G_R^2}{H_R + \lambda} + \frac{(G_L + G_R)^2}{H_L + H_R + \lambda} \right] - \gamma \quad (7)$$

In this formula,  $G_L$  and  $G_R$  are the sums of the first-order gradients of the samples in the left and right child nodes,  $H_L$  and  $H_R$  are the sums of the second-order gradients (Hessians), and  $\gamma$  is the regularization parameter for leaf formulation.

## 8. CatBoost Regression

CatBoost is an advanced gradient boosting library that handles categorical features automatically using an algorithm called Ordered Target Statistics. To prevent prediction shift—a common issue in boosting—it utilizes an ordered boosting scheme. The algorithm minimizes the expected loss function defined as:

$$L(\theta) = E_{(x,y) \sim P}[L(y, F(x))] \quad (8)$$

Where  $L$  is the loss function (e.g., squared error for regression), and  $F(x)$  is the predictive model. CatBoost builds symmetric (oblivious) trees where the same split feature and condition are used across the entire level of the tree, which facilitates efficient execution and reduces the risk of overfitting.

**Table S1.**

The optimal hyperparameters of the machine learning models determined by Genetic Algorithm.

| Model             | Hyperparameter       | Optimal Value |
|-------------------|----------------------|---------------|
| Linear Regression | Fit Intercept        | TRUE          |
| Decision Tree     | Fit Intercept        | TRUE          |
| Ridge Regression  | Alpha                | 0.743         |
| Random Forest     | Number of Estimators | 97            |
|                   | Max Depth            | 10            |
|                   | Min. Samples Leaf    | 1             |
| CatBoost          | Iterations           | 166           |
|                   | Learning Rate        | 0.197         |
|                   | Depth                | 6             |
|                   | L2 Leaf Reg          | 7.687         |
|                   | Random Strength      | 6.777         |
| XGBoost           | Learning Rate        | 0.15          |
|                   | Max Depth            | 37            |
|                   | Min. Child Weight    | 6             |
|                   | Gamma                | 0.008         |
| LightGBM          | Learning Rate        | 0.274         |
|                   | Max Depth            | 10            |
|                   | Number of Leaves     | 88            |
|                   | Min. Child Samples   | 8             |
|                   | Subsample            | 0.595         |
|                   | Colsample By Tree    | 0.619         |
|                   | Reg Alpha (L1)       | 1.535         |

|      |                    |       |
|------|--------------------|-------|
| GBDT | Reg Lambda (L2)    | 0.293 |
|      | Learning Rate      | 0.141 |
|      | Max Depth          | 21    |
|      | Min. Samples Split | 17    |
|      | Min. Samples Leaf  | 1     |
|      | Max Features       | 0.313 |

---

**Table S2.** Dataset for predicting pressure-induced emission shifts and sensitivity in lanthanide and transition metal doped phosphors.

| Name                                                                                  | Valence | a(Å)    | b(Å)    | c(Å)    | V(Å <sup>3</sup> ) | Coord. No. | Ionic Radius(Å) | Centroid (nm) | Phonon Energy(cm <sup>-1</sup> ) | Sensitivity (nm/GPa) | Ref. |
|---------------------------------------------------------------------------------------|---------|---------|---------|---------|--------------------|------------|-----------------|---------------|----------------------------------|----------------------|------|
| Ca <sub>2</sub> Gd <sub>8</sub> Si <sub>6</sub> O <sub>26</sub> :Ce <sup>3+</sup>     | 3       | 9.74    | 9.74    | 5.74    | 531.752            | 7          | 1.07            | 395           | 554                              | 3                    | [1]  |
| Ca <sub>2</sub> Gd <sub>8</sub> Si <sub>6</sub> O <sub>26</sub> :Ce <sup>3+</sup>     | 3       | 9.74    | 9.74    | 5.74    | 531.752            | 9          | 1.196           | 395           | 554                              | 3                    | [1]  |
| Y <sub>6</sub> Ba <sub>4</sub> (SiO <sub>4</sub> ) <sub>6</sub> F:Ce <sup>3+</sup>    | 3       | 9.8894  | 9.8894  | 7.3584  | 623.24             | 9          | 1.196           | 465           | 600                              | 0.63                 | [2]  |
| Y <sub>6</sub> Ba <sub>4</sub> (SiO <sub>4</sub> ) <sub>6</sub> F:Ce <sup>3+</sup>    | 3       | 9.8894  | 9.8894  | 7.3584  | 623.24             | 7          | 1.07            | 465           | 600                              | 0.63                 | [2]  |
| Y <sub>2</sub> SiO <sub>5</sub> :Pr <sup>3+</sup>                                     | 3       | 12.5    | 6.73    | 10.42   | 839.5              | 7          | 1.066           | 320           | 550                              | 1.04                 | [3]  |
| Y <sub>2</sub> Ge <sub>0.1</sub> Si <sub>0.9</sub> O <sub>5</sub> :Pr <sup>3+</sup>   | 3       | 12.55   | 6.75    | 10.46   | 865                | 7          | 1.066           | 320           | 570                              | 1.28                 | [3]  |
| Y <sub>2</sub> Ge <sub>0.25</sub> Si <sub>0.75</sub> O <sub>5</sub> :Pr <sup>3+</sup> | 3       | 12.6    | 6.78    | 10.5    | 885                | 7          | 1.066           | 320           | 600                              | 0.69                 | [3]  |
| Ca <sub>9</sub> NaZn(PO <sub>4</sub> ) <sub>7</sub> :Eu <sup>2+</sup>                 | 2       | 10.3478 | 10.3478 | 37.0491 | 3435.64            | 8          | 1.25            | 495           | 720                              | 5.21                 | [4]  |
| BaCN <sub>2</sub> ::Eu <sup>2+</sup>                                                  | 2       | 6.0249  | 6.0249  | 7.1924  | 262.6              | 4          | 1.17            | 660           | 600                              | 19                   | [5]  |
| BaLi <sub>2</sub> Al <sub>2</sub> Si <sub>2</sub> N <sub>6</sub> ::Eu <sup>2+</sup>   | 2       | 7.85    | 7.85    | 9.898   | 613.4              | 8          | 1.39            | 532           | 650                              | 1.58                 | [6]  |
| SrB <sub>4</sub> O <sub>7</sub> :Sm <sup>2+</sup>                                     | 2       | 4.431   | 10.707  | 4.237   | 200.81             | 9          | 1.41            | 685           | 700                              | 0.29                 | [7]  |
| NaBiF <sub>4</sub> :Er <sup>3+</sup>                                                  | 3       | 6.144   | 6.144   | 3.721   | 119.8              | 9          | 1.06            | 1500          | 350                              | 0.8                  | [8]  |
| YVO <sub>4</sub> :Er <sup>3+</sup>                                                    | 3       | 7.1224  | 7.1224  | 6.2913  | 319.15             | 8          | 0.985           | 1605          | 900                              | 1.77                 | [9]  |
| YVO <sub>4</sub> :Er <sup>3+</sup>                                                    | 3       | 7.1224  | 7.1224  | 6.2913  | 319.15             | 8          | 0.985           | 1596          | 900                              | 1.282                | [9]  |
| Zn <sub>2</sub> GeO <sub>4</sub> :Mn <sup>2+</sup>                                    | 2       | 14.0719 | 14.0719 | 9.7212  | 1606.23            | 6          | 0.66            | 536           | 600                              | 21.3                 | [10] |
| ZnS/CaZnOS:Mn <sup>2+</sup>                                                           | 2       | 3.757   | 3.757   | 11.401  | 139.42             | 6          | 0.83            | 618.57        | 365                              | 6.2                  | [11] |
| Na <sub>3</sub> CsMg <sub>7</sub> (PO <sub>4</sub> ) <sub>6</sub> :Eu <sup>2+</sup>   | 2       | 12.7263 | 10.6969 | 15.5196 | 1945.43            | 6          | 1.17            | 451           | 700                              | 2.13                 | [12] |
| Na <sub>3</sub> CsMg <sub>7</sub> (PO <sub>4</sub> ) <sub>6</sub> :Eu <sup>2+</sup>   | 2       | 12.7263 | 10.6969 | 15.5196 | 1945.43            | 7          | 1.2             | 451           | 700                              | 2.13                 | [12] |
| Li <sub>4</sub> SrCa(SiO <sub>4</sub> ) <sub>2</sub> :Eu <sup>2+</sup>                | 2       | 4.983   | 9.93    | 14.057  | 696.671            | 6          | 1.17            | 584           | 845                              | 5.19                 | [13] |

|                                                                            |   |         |         |         |           |   |       |        |      |        |      |
|----------------------------------------------------------------------------|---|---------|---------|---------|-----------|---|-------|--------|------|--------|------|
| $\text{Lu}_2\text{Mg}_2\text{Al}_2\text{Si}_2\text{O}_{12}:\text{Mn}^{2+}$ | 2 | 11.872  | 11.872  | 11.872  | 1673.51   | 6 | 0.83  | 597.61 | 750  | 3.53   | [14] |
| $\text{NaY}_9(\text{SiO}_4)_6\text{O}_2:\text{Mn}^{2+}$                    | 2 | 9.33375 | 9.33375 | 6.74936 | 509.2204  | 9 | 1.045 | 617.2  | 775  | 7      | [15] |
| $\text{NaY}_9(\text{SiO}_4)_6\text{O}_2:\text{Mn}^{2+}$                    | 2 | 9.33375 | 9.33375 | 6.74936 | 509.2204  | 7 | 0.9   | 617.2  | 775  | 7      | [15] |
| $\text{K}_2\text{HfSi}_2\text{O}_7:\text{Eu}^{2+}$                         | 2 | 9.6122  | 14.2105 | 5.5633  | 676.89    | 7 | 1.46  | 450    | 675  | 3.25   | [16] |
| $\text{Mg}_2\text{Gd}_8(\text{SiO}_4)_6\text{O}_2:\text{Ce}^{3+}$          | 3 | 9.38763 | 9.38763 | 6.78468 | 517.855   | 9 | 1.196 | 515    | 2200 | 1.84   | [17] |
| $\text{La}_6\text{Sr}_4(\text{SiO}_4)_6\text{F}_2:\text{Ce}^{3+}$          | 3 | 9.75    | 9.75    | 7.27    | 598.7     | 7 | 1.07  | 573    | 520  | 2      | [18] |
| $\text{Cs}_2\text{TeCl}_6$                                                 | 3 | 10.4688 | 10.4688 | 10.4688 | 1147.335  | 6 | 0.605 | 596.3  | 225  | 3.54   | [19] |
| $\text{La}_3\text{Mg}_2\text{SbO}_9:\text{Mn}^{4+}$                        | 4 | 7.9565  | 5.652   | 18.6237 | 757.4     | 6 | 0.53  | 691    | 825  | 1.2    | [20] |
| $\text{Ca}_8\text{Zn}(\text{SiO}_4)_4\text{Cl}_2:\text{Eu}^{2+}$           | 2 | 15.118  | 15.118  | 15.118  | 3454.95   | 8 | 1.25  | 500.2  | 675  | 4.18   | [21] |
| $\text{Ca}_4\text{Y}_3\text{Si}_7\text{O}_{15}\text{N}_5:\text{Eu}^{2+}$   | 2 | 10.028  | 10.028  | 10.033  | 873.834   | 6 | 1.17  | 507    | 725  | 1.13   | [22] |
| $\text{Ca}_4\text{Y}_3\text{Si}_7\text{O}_{15}\text{N}_5:\text{Eu}^{2+}$   | 2 | 10.028  | 10.028  | 10.033  | 873.834   | 8 | 1.25  | 507    | 725  | 1.13   | [22] |
| $\text{Sr}_2\text{LuNbO}_6:\text{Mn}^{4+}$                                 | 4 | 5.7845  | 5.8139  | 8.2033  | 275.88    | 6 | 0.53  | 686.6  | 865  | 0.82   | [23] |
| $\text{Ba}_3\text{Lu}(\text{BO}_3)_3:\text{Cr}^{3+}$                       | 3 | 9.3814  | 9.3814  | 17.4305 | 1328.56   | 6 | 1.01  | 485    | 2200 | 3.51   | [24] |
| $\text{Ba}_3\text{Lu}(\text{BO}_3)_3:\text{Cr}^{3+}$                       | 3 | 9.3814  | 9.3814  | 17.4305 | 1328.56   | 9 | 1.2   | 485    | 2200 | 3.51   | [24] |
| $\text{Sr}_2[\text{MgAl}_5\text{N}_7]:\text{Eu}^{2+}$                      | 2 | 10.4917 | 10.422  | 3.2573  | 356.17    | 8 | 1.25  | 650    | 675  | 5.07   | [25] |
| $\text{Zn}_3\text{Ga}_2\text{GeO}_8:\text{Mn}^{4+}$                        | 4 | 8.25    | 8.25    | 8.25    | 561.5     | 6 | 0.53  | 695.6  | 725  | 0.844  | [26] |
| $\text{Sr}_4\text{Al}_{14}\text{O}_{25}:\text{Mn}^{4+}$                    | 4 | 24.7803 | 8.4797  | 4.8873  | 1026.9659 | 6 | 0.535 | 653    | 880  | 1.35   | [27] |
| $\text{YPO}_4:\text{Er}^{3+}$                                              | 3 | 6.8791  | 6.8791  | 6.0147  | 285.7     | 8 | 0.985 | 1589   | 1100 | 0.539  | [28] |
| $\text{Ca}_2\text{Gd}_8(\text{SiO}_4)_6\text{O}_2:\text{Mn}^{2+}$          | 2 | 9.4042  | 9.4042  | 6.8651  | 525.801   | 7 | 0.83  | 592.2  | 554  | 7.25   | [29] |
| $\text{Cs}_2\text{PtCl}_6$                                                 | 3 | 10.2131 | 10.2131 | 10.2131 | 1065.301  | 6 | 0.625 | 675    | 335  | 7.19   | [30] |
| $\text{SrF}_2:\text{Er}^{3+}$                                              | 3 | 5.79    | 5.79    | 5.79    | 194.1     | 8 | 0.98  | 520    | 296  | 0.74   | [31] |
| $\text{YF}_3:\text{Er}^{3+}$                                               | 3 | 6.36    | 6.89    | 4.32    | 189.7     | 8 | 0.98  | 545    | 350  | 0.1855 | [32] |
| $\text{SrB}_2\text{O}_4:\text{Sm}^{2+}$                                    | 2 | 7.12    | 8.43    | 5.41    | 323.5     | 8 | 1.41  | 685.5  | 725  | 0.244  | [33] |

|                                                                                        |   |         |        |        |        |   |       |        |       |       |      |
|----------------------------------------------------------------------------------------|---|---------|--------|--------|--------|---|-------|--------|-------|-------|------|
| Li <sub>2</sub> Mg <sub>3</sub> TiO <sub>6</sub> :Cr <sup>3+</sup>                     | 3 | 8.35    | 8.35   | 8.35   | 582.9  | 6 | 0.615 | 850    | 730   | 9.03  | [34] |
| MgO:Cr <sup>3+</sup>                                                                   | 3 | 4.2192  | 4.2192 | 4.2192 | 74.0   | 6 | 0.615 | 720    | 760   | 0.504 | [35] |
| Li <sub>3</sub> Sc <sub>2</sub> (PO <sub>4</sub> ) <sub>3</sub> :Cr <sup>3+</sup>      | 3 | 10.48   | 6.72   | 13.46  | 958.5  | 6 | 0.615 | 980    | 1020  | 23.9  | [36] |
| CaAl <sub>12</sub> O <sub>19</sub> :Cr <sup>3+</sup>                                   | 3 | 5.56    | 5.56   | 21.9   | 586.6  | 6 | 0.615 | 686    | 618   | 0.18  | [37] |
| Ca <sub>0.8</sub> Sr <sub>0.2</sub> MgSi <sub>2</sub> O <sub>6</sub> :Cr <sup>3+</sup> | 3 | 9.747   | 8.94   | 5.251  | 440.48 | 6 | 0.615 | 780    | 1010  | 6.8   | [38] |
| K <sub>2</sub> Ge <sub>4</sub> O <sub>9</sub> :Mn <sup>4+</sup>                        | 4 | 11.84   | 11.84  | 9.79   | 1197.5 | 6 | 0.53  | 650    | 515   | 0.59  | [39] |
| SrGdAlO <sub>4</sub> :Mn <sup>4+</sup>                                                 | 4 | 3.663   | 3.663  | 11.998 | 158.7  | 6 | 0.53  | 715.66 | 740   | 0.79  | [40] |
| Ca <sub>5</sub> (BO <sub>3</sub> ) <sub>3</sub> F:Bi <sup>3+</sup>                     | 3 | 8.12    | 12.45  | 6.58   | 658    | 6 | 1.03  | 457    | 923   | 4.76  | [41] |
| SrFCl:Sm <sup>2+</sup>                                                                 | 2 | 5.96    | 5.96   | 2.98   | 107.5  | 9 | 1.27  | 690    | 500   | 1.10  | [42] |
| BaFCl:Sm <sup>2+</sup>                                                                 | 2 | 6.2     | 6.2    | 3.1    | 119.1  | 9 | 1.27  | 688    | 500   | 1.05  | [42] |
| Cs <sub>2</sub> WCl <sub>6</sub> :W <sup>4+</sup>                                      | 4 | 10.23   | 10.23  | 10.23  | 1070   | 6 | 0.66  | 973    | 261.2 | 7.9   | [43] |
| ZnAl <sub>2</sub> O <sub>4</sub> : Mn <sup>2+</sup>                                    | 2 | 9.61    | 9.61   | 9.61   | 528.95 | 6 | 0.83  | 519.1  | 150   | 2.12  | [44] |
| ALN:Eu <sup>2+</sup>                                                                   | 2 | 3.116   | 3.116  | 4.987  | 41.93  | 6 | 1.09  | 528    | 150   | 5.9   | [45] |
| CeF <sub>3</sub> : Tb <sup>3+</sup>                                                    | 3 | 7.1     | 7.1    | 7.26   | 314    | 6 | 0.919 | 543    | 50    | 1.1   | [46] |
| MgGeO <sub>3</sub> : Mn <sup>2+</sup>                                                  | 2 | 18.7112 | 8.7566 | 5.2595 | 861.75 | 6 | 0.89  | 680    | 445   | 5.43  | [47] |
| Gd(Zn,Mg)B <sub>5</sub> O <sub>10</sub> :Mn <sup>2+</sup>                              | 2 | 8.616   | 7.593  | 12.376 | 612.01 | 6 | 0.66  | 634.1  | 496   | 5.54  | [48] |
| ZnS: Mn <sup>2+</sup>                                                                  | 2 | 3.822   | 3.822  | 6.258  | 79.18  | 4 | 0.66  | 586    | 430   | 9.9   | [49] |
| CsPbBr <sub>3</sub> :Pb <sup>2+</sup>                                                  | 2 | 5.87    | 5.87   | 5.87   | 202    | 6 | 1.19  | 523.95 | 120   | 9.6   | [50] |
| Sr <sub>2</sub> MgSi <sub>2</sub> O <sub>7</sub> :Eu <sup>2+</sup>                     | 2 | 7.84    | 7.84   | 5.03   | 309    | 8 | 1.25  | 485    | 800   | 8.11  | [51] |
| Cs <sub>2</sub> NaBiCl <sub>6</sub> :Mn <sup>2+</sup>                                  | 2 | 10.78   | 10.78  | 10.78  | 1252   | 6 | 0.83  | 590    | 300   | 8.5   | [52] |
| SrZnOS: Mn <sup>2+</sup>                                                               | 2 | 3.8     | 3.8    | 6.27   | 78.5   | 4 | 0.66  | 608    | 300   | 5     | [53] |
| Lu <sub>3</sub> Al <sub>5</sub> O <sub>12</sub> :Tb <sup>3+</sup>                      | 3 | 11.917  | 11.917 | 11.917 | 1692.7 | 8 | 1.04  | 667    | 750   | 0.85  | [54] |
| Lu <sub>3</sub> Al <sub>5</sub> O <sub>12</sub> :Eu <sup>3+</sup>                      | 3 | 11.919  | 11.919 | 11.919 | 1693.6 | 8 | 1.066 | 667    | 750   | 0.86  | [54] |

|                                                                       |   |        |        |         |         |   |       |     |     |      |      |
|-----------------------------------------------------------------------|---|--------|--------|---------|---------|---|-------|-----|-----|------|------|
| K <sub>3</sub> GaF <sub>6</sub> :Cr <sup>3+</sup>                     | 3 | 8      | 8      | 11.3    | 724     | 6 | 0.615 | 758 | 400 | 0.42 | [55] |
| LiCaY <sub>5</sub> (BO <sub>3</sub> ) <sub>6</sub> :Ce <sup>3+</sup>  | 3 | 7.0164 | 7.0164 | 25.4399 | 1085    | 6 | 1.01  | 434 | 350 | 2.05 | [56] |
| LiTaO <sub>3</sub> :Tb <sup>3+</sup>                                  | 3 | 5.154  | 5.154  | 13.781  | 316.8   | 6 | 0.923 | 496 | 300 | 2.12 | [57] |
| CaYMgNbO <sub>6</sub> :Mn <sup>4+</sup>                               | 4 | 5.49   | 5.49   | 7.89    | 246.87  | 6 | 0.53  | 690 | 690 | 1.01 | [58] |
| Sr <sub>8</sub> MgSc(PO <sub>4</sub> ) <sub>7</sub> :Eu <sup>2+</sup> | 2 | 17.98  | 17.98  | 18.35   | 2561.77 | 8 | 1.25  | 516 | 516 | 2.03 | [59] |

**Table S3.** The dataset of four unseen material systems used for evaluating the generalization capability of the proposed machine learning framework.

| Name                                                                              | Valence | a(Å)    | b(Å)   | c(Å)   | V(Å <sup>3</sup> ) | Coord. No. | Ionic Radius(Å) | Centroid (nm) | Phonon Energy(cm <sup>-1</sup> ) | Sensitivity (nm/GPa) | Ref. |
|-----------------------------------------------------------------------------------|---------|---------|--------|--------|--------------------|------------|-----------------|---------------|----------------------------------|----------------------|------|
| Sr <sub>8</sub> Si <sub>4</sub> O <sub>12</sub> Cl <sub>8</sub> :Eu <sup>2+</sup> | 2       | 11.201  | 11.201 | 9.584  | 1202.39            | 8          | 1.25            | 500           | 633                              | 9.69                 | [60] |
| LiScGeO <sub>4</sub> :Cr <sup>3+</sup>                                            | 3       | 10.6738 | 5.9913 | 4.9689 | 317.761            | 6          | 0.615           | 1100          | 790                              | 23.63                | [61] |
| Gd <sub>2</sub> ZnTiO <sub>6</sub> :Mn <sup>4+</sup>                              | 4       | 5.3844  | 5.6872 | 7.7075 | 236.018            | 6          | 0.53            | 705           | 825                              | 1.11                 | [62] |
| NaMgBO <sub>3</sub> :Ce <sup>3+</sup>                                             | 3       | 5.0131  | 8.8007 | 5.5283 | 243                | 8          | 1.143           | 469.3         | 993.3                            | 2.94                 | [63] |

## References

1. T. Zheng, L. Luo, P. Du, S. Lis, U. R. Rodríguez-Mendoza, V. Lavín, I. R. Martín, and M. Runowski, "Pressure-triggered enormous redshift and enhanced emission in Ca<sub>2</sub>Gd<sub>8</sub>Si<sub>6</sub>O<sub>26</sub>:Ce<sup>3+</sup> phosphors: Ultrasensitive, thermally-stable and ultrafast response pressure monitoring," *Chemical Engineering Journal* **443**, 136414 (2022).
2. M. Runowski, P. Woźny, N. Stopikowska, Q. Guo, and S. Lis, "Optical Pressure Sensor Based on the Emission and Excitation Band Width (fwhm) and Luminescence Shift of Ce<sup>3+</sup>-Doped Fluorapatite—High-Pressure Sensing," *ACS Appl. Mater. Interfaces* **11**(4), 4131–4138 (2019).
3. M. Sójka, M. Runowski, P. Woźny, L. D. Carlos, E. Zych, and S. Lis, "Y<sub>2</sub>(Ge,Si)O<sub>5</sub>:Pr phosphors: multimodal temperature and pressure sensors shaped by bandgap management," *Journal of Materials Chemistry C* **9**(39), 13818–13831 (2021).
4. D. Zhang, B. Zheng, Z. Zheng, L. Li, Q. Yang, Y. Song, B. Zou, and H. Zou, "Multifunctional Ca<sub>9</sub>NaZn<sub>1-y</sub>Mg<sub>y</sub>(PO<sub>4</sub>)<sub>7</sub>:Eu<sup>2+</sup> phosphor for full-spectrum lighting,

- optical thermometry and pressure sensor applications," *Chemical Engineering Journal* **431**, 133805 (2022).
5. Y. Masubuchi, S. Nishitani, S. Miyazaki, H. Hua, J. Ueda, M. Higuchi, and S. Tanabe, "Large red-shift of luminescence from BaCN2:Eu<sup>2+</sup> red phosphor under high pressure," *Appl. Phys. Express* **13**(4), 042009 (2020).
  6. Y. Wang, T. Seto, K. Ishigaki, Y. Uwatoko, G. Xiao, B. Zou, G. Li, Z. Tang, Z. Li, and Y. Wang, "Pressure-Driven Eu<sup>2+</sup>-Doped BaLi<sub>2</sub>Al<sub>2</sub>Si<sub>2</sub>N<sub>6</sub>: A New Color Tunable Narrow-Band Emission Phosphor for Spectroscopy and Pressure Sensor Applications," *Advanced Functional Materials* **30**(34), 2001384 (2020).
  7. T. Zheng, M. Runowski, P. Woźny, S. Lis, and V. Lavín, "Huge enhancement of Sm<sup>2+</sup> emission via Eu<sup>2+</sup> energy transfer in a SrB<sub>4</sub>O<sub>7</sub> pressure sensor," *Journal of Materials Chemistry C* **8**(14), 4810–4817 (2020).
  8. P. Lei, R. An, X. Zhai, S. Yao, L. Dong, X. Xu, K. Du, M. Zhang, J. Feng, and H. Zhang, "Benefits of surfactant effects on quantum efficiency enhancement and temperature sensing behavior of NaBiF<sub>4</sub> upconversion nanoparticles," *J. Mater. Chem. C* **5**(37), 9659–9665 (2017).
  9. M. Runowski, T. Zheng, P. Woźny, and P. Du, "NIR emission of lanthanides for ultrasensitive luminescence manometry—Er<sup>3+</sup> -activated optical sensor of high pressure," *Dalton Transactions* **50**(41), 14864–14871 (2021).
  10. J. Xue, M. Runowski, K. Soler-Carracedo, P. Woźny, A. Muñoz, L. Luo, K. Chen, Y. Huang, V. Lavín, and P. Du, "Super-Sensitive Multi-Modal Optical Manometer Based on Huge Pressure-Induced Spectral Red-Shift and Broadening of Mn<sup>2+</sup> Emission Band in Green-Emitting Zn<sub>2</sub>GeO<sub>4</sub> Phosphors," *Advanced Optical Materials* **13**(5), 2402399 (2025).
  11. T. Zheng, M. Runowski, I. R. Martín, K. Soler-Carracedo, L. Peng, M. Skwierczyńska, M. Sójka, J. Barzowska, S. Mahlik, H. Hemmerich, F. Rivera-López, P. Kulpiński, V. Lavín, D. Alonso, and D. Peng, "Mechanoluminescence and Photoluminescence Heterojunction for Superior Multimode Sensing Platform of Friction, Force, Pressure, and Temperature in Fibers and 3D-Printed Polymers," *Advanced Materials* **35**(40), 2304140 (2023).
  12. H. Chen, T. Seto, and Y. Wang, "An efficient blue phosphor with high thermal stability for lighting and optical pressure sensor applications," *Inorg. Chem. Front.* **9**(8), 1644–1654 (2022).
  13. K. Su, L. Mei, Q. Guo, P. Shuai, Y. Wang, Y. Liu, Y. Jin, Z. Peng, B. Zou, and L. Liao, "Multi-Mode Optical Manometry Based on Li<sub>4</sub>SrCa(SiO<sub>4</sub>)<sub>2</sub>:Eu<sup>2+</sup> Phosphors," *Advanced Functional Materials* **33**(49), 2305359 (2023).
  14. Z. Zheng, Y. Song, B. Zheng, Y. Zhao, Q. Wang, X. Zhang, B. Zou, and H. Zou, "Eu<sup>2+</sup> and Mn<sup>2+</sup> co-doped Lu<sub>2</sub>Mg<sub>2</sub>Al<sub>2</sub>Si<sub>2</sub>O<sub>12</sub> phosphors for high sensitivity and multi-mode optical pressure sensing," *Inorg. Chem. Front.* **10**(9), 2788–2798 (2023).
  15. Q. Zeng, M. Runowski, J. Xue, L. Luo, L. Marciniak, V. Lavín, and P. Du, "Pressure-Induced Remarkable Spectral Red-Shift in Mn<sup>2+</sup>-Activated NaY<sub>9</sub>(SiO<sub>4</sub>)<sub>6</sub>O<sub>2</sub> Red-Emitting Phosphors for High-Sensitive Optical Manometry," *Advanced Science* **11**(9), 2308221 (2024).
  16. Q. Lv, C. Wang, S. Chen, H. Zheng, E. Dong, and G. Zhu, "Ultrasensitive Pressure-Induced Optical Materials: Europium-Doped Hafnium Silicates with a

- Khibinskite Structure for Optical Pressure Sensors and WLEDs," *Inorg. Chem.* **61**(7), 3212–3222 (2022).
17. B. Zheng, X. Zhang, D. Zhang, F. Wang, Z. Zheng, X. Yang, Q. Yang, Y. Song, B. Zou, and H. Zou, "Ultra-wideband phosphor  $\text{Mg}_2\text{Gd}_8(\text{SiO}_4)_6\text{O}_2:\text{Ce}^{3+},\text{Mn}^{2+}$ : Energy transfer and pressure-driven color tuning for potential applications in LEDs and pressure sensors," *Chemical Engineering Journal* **427**, 131897 (2022).
  18. M. Szymczak, P. Du, M. Runowski, P. Woźny, J. Xue, T. Zheng, and L. Marciniak, "Highly Sensitive Optical Manometer Based on the Visible Emissions of  $\text{Ce}^{3+}$ -Doped  $\text{La}_6\text{Sr}_4(\text{SiO}_4)_6\text{F}_2$  Multisite Phosphors," *Advanced Optical Materials* **12**(7), 2302147 (2024).
  19. Z. Pei, M. Runowski, P. Woźny, P. Du, and N. Chen, "Tailoring the Luminescence Properties of  $\text{Cs}_2\text{TeCl}_6$  Nanocrystals via High-Pressure and Low-Temperature Stimuli for Multiparameter Optical Manometry and Thermometry," *Inorg. Chem.* **64**(40), 20439–20448 (2025).
  20. Z. Chen, S. Du, F. Li, S. Zhang, S. Zhao, Z. Tian, J. Zhang, X. Yuan, G. Liu, and K. Chen, "Bifunctional optical probe based on  $\text{La}_3\text{Mg}_2\text{SbO}_9:\text{Mn}^{4+}$  phosphors for temperature and pressure sensing," *Journal of Materials Science & Technology* **194**, 98–109 (2024).
  21. P. Du, J. Xue, S. Ma, P. Woźny, V. Lavín, L. Luo, and M. Runowski, "Pressure-triggered polychromatic luminescence in  $\text{Eu}^{2+}$ -activated  $\text{Ca}_8\text{Zn}(\text{SiO}_4)_4\text{Cl}_2$  phosphors for high-sensitivity visual optical manometry," *Mater. Horiz.* **12**(13), 4822–4832 (2025).
  22. B. Zheng, Y. Song, Z. Zheng, Y. Zhao, Q. Yang, Z. Shi, B. Zou, and H. Zou, " $\text{Eu}^{2+}$ -Doped  $\text{Ca}_4\text{Y}_3\text{Si}_7\text{O}_{15}\text{N}_5$  Phosphor with High Thermal Stability and Pressure Sensitivity for Dual-Functional Applications in W-LEDs and Pressure Sensors," *Inorganic Chemistry* (2023).
  23. Z. Chen, S. Du, K. Zhu, Z. Tian, J. Zhang, F. Li, S. Zhang, S. Zhao, W. Cui, X. Yuan, K. Chen, G. Yuan, and G. Liu, " $\text{Mn}^{4+}$ -Activated Double-Perovskite-Type  $\text{Sr}_2\text{LuNbO}_6$  Multifunctional Phosphor for Optical Probing and Lighting," *ACS Applied Materials & Interfaces* (2023).
  24. Y. Zhao, Z. Zheng, Z. Li, Z. Shi, Y. Song, B. Zou, and H. Zou, " $\text{Ba}_3\text{Lu}(\text{BO}_3)_3:\text{Ce}^{3+},\text{Tb}^{3+}/\text{Mn}^{2+}$ : Dual-Functional Material for WLEDs and Optical Pressure Sensing," *Inorganic Chemistry* (2024).
  25. Z. Li, H. Wang, Z. Su, R. Kang, T. Seto, and Y. Wang, "Enhanced Quantum Efficiency via Co-Substitution in Red-Emitting Phosphor  $\text{Sr}_2[\text{MgAl}_5\text{N}_7]:\text{Eu}^{2+}$  for Advanced Spectroscopic Applications Including Laser Displays with Ultra-High Luminescence Saturation Threshold," *Angewandte Chemie* **137**(7), e202419910 (2025).
  26. C. Su, D. Xu, K. Li, X. Xie, Y. Ren, Y. Liu, Y. Jin, M. Du, and P. Shen, " $\text{Mn}^{4+}$ -Activated Inorganic Phosphor  $\text{Zn}_3\text{Ga}_2\text{GeO}_8$ : A High-Sensitivity and Broad-Range Pressure Sensor Material for Optical Manometry," *The Journal of Physical Chemistry C* (2024).
  27. N. Zhang, Y.-T. Tsai, M.-H. Fang, C.-G. Ma, A. Lazarowska, S. Mahlik, M. Grinberg, C.-Y. Chiang, W. Zhou, J. G. Lin, J.-F. Lee, J. Zheng, C. Guo, and R.-S. Liu, "Aluminate Red Phosphor in Light-Emitting Diodes: Theoretical Calculations, Charge Varieties, and High-Pressure Luminescence Analysis," *ACS Appl. Mater. Interfaces* **9**(28), 23995–24004 (2017).
  28. M. Runowski, P. Woźny, and I. R. Martín, "Optical pressure sensing in vacuum and high-pressure ranges using lanthanide-based luminescent thermometer–

- manometer," *J. Mater. Chem. C* **9**(13), 4643–4651 (2021).
29. P. Du, J. Xue, A. M. González, L. Luo, P. Woźny, U. R. Rodríguez-Mendoza, V. Lavín, and M. Runowski, "Highly pressure-responsive dual-mode optical manometer based on Mn<sup>2+</sup>-activated Ca<sub>2</sub>Gd<sub>8</sub>(SiO<sub>4</sub>)<sub>6</sub>O<sub>2</sub> phosphors," *Chemical Engineering Journal* **505**, 159652 (2025).
  30. Z. Pei, M. Runowski, X. Ge, P. Woźny, L. Luo, and P. Du, "Spectral Regulation in Cs<sub>2</sub>PtCl<sub>6</sub> Double Perovskite via Low-Temperature and High-Pressure Engineering for Advanced Optical Thermometry and Manometry," *ACS Applied Materials & Interfaces* (2025).
  31. M. Runowski, J. Marciniak, T. Grzyb, D. Przybylska, A. Shyichuk, B. Barszcz, A. Katrusiak, and S. Lis, "Lifetime nanomanometry – high-pressure luminescence of up-converting lanthanide nanocrystals – SrF<sub>2</sub>:Yb<sup>3+</sup>,Er<sup>3+</sup>," *Nanoscale* **9**(41), 16030–16037 (2017).
  32. S. Goderski, M. Runowski, P. Woźny, V. Lavín, and S. Lis, "Lanthanide Upconverted Luminescence for Simultaneous Contactless Optical Thermometry and Manometry–Sensing under Extreme Conditions of Pressure and Temperature," *ACS Applied Materials & Interfaces* (2020).
  33. M. Runowski, P. Woźny, V. Lavín, and S. Lis, "Optical pressure nano-sensor based on lanthanide doped SrB<sub>2</sub>O<sub>4</sub>:Sm<sup>2+</sup> luminescence – Novel high-pressure nanomanometer," *Sensors and Actuators B: Chemical* **273**, 585–591 (2018).
  34. M. Szymczak, P. Woźny, M. Runowski, M. Pieprz, V. Lavín, and L. Marciniak, "Temperature invariant ratiometric luminescence manometer based on Cr<sup>3+</sup> ions emission," *Chemical Engineering Journal* **453**, 139632 (2023).
  35. M. Szymczak, M. Runowski, V. Lavín, and L. Marciniak, "Highly Pressure-Sensitive, Temperature Independent Luminescence Ratiometric Manometer Based on MgO:Cr<sup>3+</sup> Nanoparticles," *Laser & Photonics Reviews* **17**(4), 2200801 (2023).
  36. M. Szymczak, J. Jaśkielewicz, M. Runowski, J. Xue, S. Mahlik, and L. Marciniak, "Highly-Sensitive, Tri-Modal Luminescent Manometer Utilizing Band-Shift, Ratiometric and Lifetime-Based Sensing Parameters," *Advanced Functional Materials* **34**(22), 2314068 (2024).
  37. M. Szymczak, A. Antuzevics, P. Rodionovs, M. Runowski, U. R. Rodríguez-Mendoza, D. Szymanski, V. Kinzhybalo, and L. Marciniak, "Bifunctional Luminescent Thermometer-Manometer Based on Cr<sup>3+</sup>–Cr<sup>3+</sup> Pair Emission," *ACS Appl. Mater. Interfaces* **16**(47), 64976–64987 (2024).
  38. M. Szymczak, K. Su, L. Mei, M. Runowski, P. Woźny, Q. Guo, L. Liao, and L. Marciniak, "Investigating the Potential of Cr<sup>3+</sup>-Doped Pyroxene for Highly Sensitive Optical Pressure Sensing," *ACS Applied Materials & Interfaces* (2024).
  39. M. Szymczak, W. M. Piotrowski, P. Woźny, M. Runowski, and L. Marciniak, "A highly sensitive lifetime-based luminescent manometer and bi-functional pressure–temperature sensor based on a spectral shift of the R-line of Mn<sup>4+</sup> in K<sub>2</sub>Ge<sub>4</sub>O<sub>9</sub>," *J. Mater. Chem. C* **12**(19), 6793–6804 (2024).
  40. M. Pieprz, M. Runowski, P. Woźny, J. Xue, and L. Marciniak, "Temperature invariant lifetime based luminescent manometer on Mn<sup>4+</sup> ions," *Journal of Materials Chemistry C* **11**(33), 11353–11360 (2023).
  41. X. Xiao, Z. Li, H. Zou, Q. Sun, Y. Song, Q. Tao, L. Li, and B. Zou, "Synthesis Design and Properties of Ca<sub>5</sub>(BO<sub>3</sub>)<sub>3</sub>F: Bi<sup>3+</sup>/Eu<sup>3+</sup>: Insight into Luminescence,

- Temperature, and Pressure Sensing," *Inorg. Chem.* **63**(11), 5175–5184 (2024).
42. Y. R. Shen and W. B. Holzapfel, "Effect of pressure on energy levels of  $\text{Sm}^{2+}$  in  $\text{BaFCl}$  and  $\text{SrFCl}$ ," *Phys. Rev. B* **51**(22), 15752–15762 (1995).
  43. J. Wang, G. Xiao, Y. Wang, X. Yu, Y. Fang, K. Wang, and B. Zou, "Pressure Modulates Emission of  $\text{Cs}_2\text{WCl}_6$  in the NIR-II Window," *Laser & Photonics Reviews* **19**(23), e01238 (2025).
  44. P. Du, X. Ge, P. Woźny, S. Ma, L. Luo, T. Cui, and M. Runowski, "Pressure-Triggered Spectral Modulation in  $\text{Mn}^{2+}$ -Doped  $\text{ZnAl}_2\text{O}_4$  Phosphors for High-Sensitivity, Broad-Pressure-Range and Multi-Parameter Optical Manometry," *Laser & Photonics Reviews* **n/a**(n/a), e02134 (n.d.).
  45. Q. Wang, W. Wu, K. Wang, H. Zheng, G. Zhu, J. zhang, H. Cui, and Q. Cui, "High pressure photoluminescence properties and structural stability of Eu doped  $\text{AlN}$  nanowires synthesized via a direct nitridation strategy," *Journal of Alloys and Compounds* **823**, 153804 (2020).
  46. T. Zhao, X. Jing, X. Zhang, C. Li, R. Liu, B. Liu, C. Yang, L. Shen, Q. Li, and B. Liu, "Pressure-induced photoluminescence enhancement of  $\text{CeF}_3:\text{Tb}^{3+}$  nanoparticles," *Nanoscale Adv.* **4**(15), 3226–3232 (2022).
  47. Y. Liu, J. Liu, X. Chen, A. Kutty, S. Yin, L. Liu, and Y. Song, "Pressure-mediated structural evolution and luminescent properties of  $\text{MgGeO}_3:\text{Mn}^{2+}$  nanoparticles: a new candidate for optical high-pressure sensors," (2025).
  48. L.-I. Bulyk, L. Vasylechko, V. Mykhaylyk, C. Tang, Y. Zhydachevskyy, Y. A. Hizhnyi, S. G. Nedilko, N. I. Klyui, and A. Suchocki, " $\text{Mn}^{2+}$  luminescence of  $\text{Gd}(\text{Zn,Mg})\text{B}_5\text{O}_{10}$  pentaborate under high pressure," *Dalton Trans.* **49**(40), 14268–14279 (2020).
  49. H. Wang, X. Chen, J. Li, M. Li, K. Liu, D. Yang, S. Peng, T. Zhao, B. Zhao, Y. Li, Y. Wang, C. Lin, and W. Yang, "Pressure- and Rate-Dependent Mechanoluminescence with Maximized Efficiency and Tunable Wavelength in  $\text{ZnS}:\text{Mn}^{2+}, \text{Eu}^{3+}$ ," *ACS Appl. Mater. Interfaces* **15**(23), 28204–28214 (2023).
  50. Z. Cui, P. Zhang, W. Li, P. Zhou, Y. Zhang, B. Liu, and Y. Li, "Pressure Effect on Luminescence Characteristics and Energy Transfer in  $\text{CsPbBr}_3/\text{ZnS}$  Nanocrystal Heterostructures," *J. Phys. Chem. C* **128**(47), 20489–20496 (2024).
  51. T. Zheng, J. Luo, D. Peng, L. Peng, P. Woźny, J. Barzowska, M. Kamiński, S. Mahlik, J. Moszczyński, K. Soler-Carracedo, F. Rivera-López, H. Hemmerich, and M. Runowski, "Persistent Photoluminescence and Mechanoluminescence of a Highly Sensitive Pressure and Temperature Gauge in Combination with a 3D-Printable Optical Coding Platform," *Advanced Science* **11**(44), 2408686 (2024).
  52. L. Zhang, Z. Liu, X. Sun, G. Niu, J. Jiang, Y. Fang, D. Duan, K. Wang, L. Sui, K. Yuan, G. Wu, and B. Zou, "Retainable Bandgap Narrowing and Enhanced Photoluminescence in  $\text{Mn}$ -Doped and Undoped  $\text{Cs}_2\text{NaBiCl}_6$  Double Perovskites by Pressure Engineering," *Advanced Optical Materials* **10**(2), 2101892 (2022).
  53. H. Wang, T. Zhao, M. Li, J. Li, K. Liu, S. Peng, X. Liu, B. Zhao, Y. Chen, J. An, X. Chen, S. Jiang, C. Lin, and W. Yang, "Oscillatory mechanoluminescence of  $\text{Mn}^{2+}$ -doped  $\text{SrZnOS}$  in dynamic response to rapid compression," *Nat Commun* **16**(1), 548 (2025).
  54. H. Zou, Z. Zheng, Z. Li, Q. Tao, X. Lv, Z. Luo, Q. Sun, L. Li, and Y. Song, "Ultrahigh Sensitivities of Dual-Mode Self-Calibration Pressure-Sensing Phosphors

- $\text{Lu}_3\text{Al}_5\text{O}_{12}:\text{Tb}^{3+}/\text{Eu}^{3+},\text{Mn}^{4+}$ ," *Inorg. Chem.* **65**(2), 1355–1365 (2026).
55. H. Li, J. Wang, Y. Liang, H. Zhang, X. Zhu, Z. Wang, and X. Cheng, "Effect of temperature and pressure on Luminescence Properties of  $\text{K}_3\text{GaF}_6:\text{Cr}^{3+}$  phosphor," *Optical Materials* **154**, 115683 (2024).
  56. Y. Gao, Y. Zhao, P. Jiang, T. Wen, Y. Wang, R. Cong, and T. Yang, "Pressure-sensitive  $\text{Ce}^{3+}$  photoluminescence in  $\text{LiCaY}_5(\text{BO}_3)_6$ : high internal quantum yields and energy transfer to  $\text{Tb}^{3+}$ ," *J. Mater. Chem. C* **10**(46), 17714–17722 (2022).
  57. S. Long, Z. Liu, and B. Wang, "Manometry strategy based on excitation spectral shift induced by pressure-controlled intervalence charge transfer in  $\text{Tb}^{3+}:\text{LiTaO}_3$ ," *Ceramics International* **51**(13), 17912–17918 (2025).
  58. C. Liao, W. Zhao, Y. Xiang, S. Zhu, X. Huang, Z. Chen, J. Xu, C. Jiang, M. Wu, and J. Zhong, "Multifunctional phosphor  $\text{CaYMgNbO}_6:\text{Mn}^{4+}, \text{M}^+$  ( $\text{M} = \text{Li} / \text{Na}$ ) for highly-efficient optical probing and lighting," *Materials Today Chemistry* **44**, 102558 (2025).
  59. B. Zheng, J. Yan, J. Li, Y. Wang, X. Yang, and W. Li, " $\text{Sr}_8\text{MgSc}(\text{PO}_4)_7:\text{Eu}^{2+}$  phosphor: d–f transition driven applications for solid-state lighting and extreme environment multimode sensing investigations," *Inorg. Chem. Front.* **12**(2), 730–743 (2025).
  60. T. Zheng, M. Runowski, J. Xue, L. Luo, U. R. Rodríguez-Mendoza, V. Lavín, I. R. Martín, P. Rodríguez-Hernández, A. Muñoz, and P. Du, "Giant Pressure-Induced Spectral Shift in Cyan-Emitting  $\text{Eu}^{2+}$ -Activated  $\text{Sr}_8\text{Si}_4\text{O}_{12}\text{Cl}_8$  Microspheres for Ultrasensitive Visual Manometry," *Advanced Functional Materials* **33**(26), 2214663 (2023).
  61. M. Szymczak, M. Runowski, M. G. Brik, and L. Marciniak, "Multimodal, super-sensitive luminescent manometer based on giant pressure-induced spectral shift of  $\text{Cr}^{3+}$  in the NIR range," *Chemical Engineering Journal* **466**, 143130 (2023).
  62. T. Zheng, L. Luo, P. Du, S. Lis, U. R. Rodríguez-Mendoza, V. Lavín, and M. Runowski, "Highly-efficient double perovskite  $\text{Mn}^{4+}$ -activated  $\text{Gd}_2\text{ZnTiO}_6$  phosphors: A bifunctional optical sensing platform for luminescence thermometry and manometry," *Chemical Engineering Journal* **446**, 136839 (2022).
  63. Y. Ma, W. Meng, M. Runowski, V. Lavín, U. R. Rodríguez-Mendoza, J. H. Jeong, and J. Xue, "High-pressure dual-mode optical manometry for visual pressure sensing using  $\text{Ce}^{3+}$ -activated  $\text{NaMgBO}_3$  phosphors," *Journal of Alloys and Compounds* **1044**, 184350 (2025).
